# Supplementary material
Source: PubMed Central journal article supplement (PMC2206579)
Supplement: pnas_0708903105_6.pdf [file pnas_0708903105_6.pdf]

**Table 2. Age and mass data used in empirical growth curve reconstructions.**

| <b>Taxon</b>         | <b>Specimen</b> | <b>Est. age, yr</b> | <b>Est. mass, kg</b> | <b>Taxon</b>      | <b>Specimen</b> | <b>Est. age, yr</b> | <b>Est. mass, kg</b> |
|----------------------|-----------------|---------------------|----------------------|-------------------|-----------------|---------------------|----------------------|
| <i>Tenontosaurus</i> | OMNH 10144      | 1                   | 23                   | <i>Allosaurus</i> | UUVP 3987       | 9                   | 239                  |
|                      | OMNH 34785      | 2                   | 45                   |                   |                 | 10                  | 331                  |
|                      | FMNH PR2263     | 2                   | 61                   |                   |                 | 11                  | 442                  |
|                      | OMNH 63525      | 7                   | 336                  |                   |                 | 12                  | 615                  |
|                      | OMNH 34784      | 8                   | 389                  |                   |                 | 13                  | 701                  |
|                      | OMNH 8137       | 8                   | 560                  |                   |                 | 14                  | 731                  |
|                      | OMNH 10134      | 8                   | 646                  |                   | UUVP 40-264     | 2                   | 19                   |
|                      | OMNH 2926       | 10                  | 628                  |                   |                 | 3                   | 60                   |
|                      | OMNH 58340      | 11                  | 306                  |                   |                 | 4                   | 64                   |
|                      | OMNH 34783      | 12                  | 843                  |                   |                 | 5                   | 76                   |
| FMNH PR2261          | 22              | 964                 | UUVP 3164            | 3                 | 32              |                     |                      |
| OMNH 62990           | 26              | 1,102               |                      | 4                 | 111             |                     |                      |
| <i>Allosaurus</i>    | UUVP 4220       | 1                   | 13                   |                   | 5               | 125                 |                      |
|                      |                 | 2                   | 40                   |                   | 6               | 130                 |                      |
|                      | UUVP 3212       | 4                   | 55                   | UUVP 30-737       | 4               | 51                  |                      |
|                      |                 | 5                   | 84                   |                   | 5               | 63                  |                      |
|                      |                 | 6                   | 96                   |                   | 6               | 74                  |                      |
|                      | UUVP 40-227     | 5                   | 88                   |                   | 7               | 87                  |                      |
|                      |                 | 6                   | 96                   |                   | 8               | 103                 |                      |
|                      |                 | 7                   | 121                  |                   | 9               | 123                 |                      |
|                      |                 | 8                   | 141                  |                   | 10              | 147                 |                      |
|                      |                 | 9                   | 168                  |                   | 11              | 161                 |                      |
|                      |                 | 10                  | 210                  |                   | 12              | 172                 |                      |
|                      |                 | 11                  | 238                  |                   | 13              | 181                 |                      |
|                      |                 | 12                  | 275                  | UUVP 11164        | 6               | 94                  |                      |
|                      | UUVP 5496       | 6                   | 131                  |                   | 7               | 161                 |                      |
|                      |                 | 7                   | 168                  |                   | 8               | 200                 |                      |
|                      |                 | 8                   | 224                  | UUVP 2656         | 9               | 237                 |                      |
|                      |                 | 9                   | 291                  |                   | 6               | 105                 |                      |
|                      |                 | 10                  | 428                  |                   | 7               | 145                 |                      |
|                      |                 | 11                  | 539                  |                   | 8               | 175                 |                      |
|                      | UUVP 10154      | 10                  | 316                  |                   | 9               | 315                 |                      |
|                      |                 | 11                  | 680                  |                   | 10              | 627                 |                      |
|                      |                 | 12                  | 722                  |                   | 11              | 640                 |                      |
|                      |                 | 13                  | 781                  | UUVP 3694         | 12              | 760                 |                      |
|                      | UUVP 3607       | 14                  | 680                  |                   | 8               | 203                 |                      |
|                      |                 | 15                  | 875                  |                   | 9               | 475                 |                      |
|                      |                 | 16                  | 958                  |                   | 10              | 660                 |                      |
|                      |                 | 17                  | 1,046                |                   | 11              | 723                 |                      |
|                      |                 | 18                  | 1,341                | UUVP 154          | 12              | 1,252               |                      |
|                      |                 | 19                  | 1,473                |                   | 3               | 32                  |                      |
|                      |                 | 20                  | 1,518                | UUVP 40304        | 4               | 95                  |                      |
|                      |                 | 21                  | 1,541                |                   | 3               | 46                  |                      |
|                      | UUVP 3689       | 0                   | 7                    |                   | 4               | 54                  |                      |
|                      |                 | 1                   | 10                   |                   | 5               | 79                  |                      |
|                      |                 | 2                   | 33                   |                   | 6               | 122                 |                      |
|                      | UUVP 2916       | 1                   | 15                   |                   | 7               | 158                 |                      |
|                      |                 | 2                   | 35                   |                   | 8               | 227                 |                      |
|                      |                 | 3                   | 55                   | UUVP 5300         | 9               | 287                 |                      |
|                      |                 | 4                   | 62                   |                   | 5               | 65                  |                      |
|                      | UUVP 30-68      | 3                   | 30                   |                   | 6               | 105                 |                      |
|                      |                 | 4                   | 52                   |                   | 7               | 129                 |                      |
|                      | 5               | 65                  |                      | 8                 | 158             |                     |                      |
|                      | 6               | 103                 |                      | 9                 | 253             |                     |                      |
|                      | 7               | 122                 |                      | 10                | 381             |                     |                      |
| UUVP 4740            | 4               | 62                  | <i>Tyrannosaurus</i> | LACM 28471        | 2               | 30                  |                      |
|                      | 5               | 95                  |                      | AMNH 30564        | 15              | 1,761               |                      |
|                      | 6               | 108                 |                      | LACM 23845        | 14              | 1,807               |                      |
|                      | 7               | 132                 |                      | ICM 2001.90.1     | 16              | 2,984               |                      |
|                      | 8               | 159                 |                      | MOR 1125          | 18              | 2,522               |                      |
|                      | 9               | 203                 |                      | RTMP 81.6.1       | 18              | 3,230               |                      |
|                      | 10              | 262                 |                      | RTMP 81.12.1      | 22              | 5,040               |                      |
|                      |                 |                     |                      | FMNH PR2081       | 28              | 5,654               |                      |

*Tenontosaurus* age/mass estimates based on those in (1), *Allosaurus* estimates from (2), *Tyrannosaurus* estimates from (3,4). AMNH, American Museum of Natural History; FMNH, Field Museum of Natural History; ICM, Indianapolis Children's Museum; LACM, Los Angeles County Museum; MOR, Museum of the Rockies; OMNH, Sam Noble Oklahoma Museum of Natural History; RTMP, Royal Tyrrell Museum of Palaeontology; UUVP, Utah Museum of Natural History.

### References

1. Werning S (2005) Thesis (University of Oklahoma, Norman).
2. Bybee PJ, Lee AH, Lamm E-T (2006) *J Morphol* 267: 347-359.
3. Horner JR, Padian K (2004) *Proc R Soc London Ser B* 271: 1875-1880.
4. Erickson GM, Makovicky PJ, Currie PJ, Norell MA, Yerby SA, Brochu CA (2004) *Nature* 430: 772-775.
