# Supplementary material
Source: PubMed Central journal article supplement (PMC2206579)
Supplement: pnas_0708903105_7.pdf [file pnas_0708903105_7.pdf]

**Table 3. Skeletochronological estimates of upper bounds of reproductive maturity (RM) and predictions of RM based on virus-to-whale scaling relationships.**

| <b>Taxon</b>         | <b>Estimated mass, kg</b> | <b>Reference</b> | <b>RM: virus-whale scaling, yr</b> | <b>RM: skeletochronological estimate, yr</b> |
|----------------------|---------------------------|------------------|------------------------------------|----------------------------------------------|
| <i>Tenontosaurus</i> | 243                       | 1                | 4 (3, 5 PI)                        | 8 (7, 8 CI)                                  |
|                      | 600                       | 2                | 6 (4, 6 PI)                        | 8 (7, 8 CI)                                  |
|                      | 1,034                     | 3                | 6 (5, 9 PI)                        | 8 (7, 8 CI)                                  |
| <i>Allosaurus</i>    | 700                       | 4                | 6 (5, 8 PI)                        | 10 (7, 13 CI)                                |
|                      | 952                       | 1                | 6 (5, 8 PI)                        | 10 (7, 13 CI)                                |
|                      | 1,400                     | 5                | 7 (5, 9 PI)                        | 10 (7, 13 CI)                                |
| <i>Tyrannosaurus</i> | 4,500                     | 5                | 9 (7, 13 PI)                       | 18 (14, 21 CI)                               |
|                      | 5,654                     | 6                | 10 (8, 13 PI)                      | 18 (14, 21 CI)                               |
|                      | 6,650                     | 1                | 10 (8, 14 PI)                      | 18 (14, 21 CI)                               |
|                      | 10,200                    | 4                | 12 (9, 16 PI)                      | 18 (14, 21 CI)                               |

Values in parentheses are nominal 95% prediction intervals (PI) or confidence intervals (CI).

#### References

1. Seebacher F (2001) *J Vertebr Paleontol* 21: 51-60.
2. Spotila JR, O'Connor MP, Dodson P, Paladino FV (1991) *Mod Geol* 16: 203-227.
3. Werning S (2005) Thesis (University of Oklahoma, Norman, OK).
4. Therrien F, Henderson DM (2007) *J Vertebr Paleontol* 27: 108-115.
5. Anderson JF, Hall-Martin A, Russell DA (1985) *J Zool* 207: 53-61.
6. Erickson GM, Makovicky PJ, Currie PJ, Norell MA, Yerby SA, Brochu CA (2004) *Nature* 430: 772-775.
