# Supplementary material
Source: PubMed Central journal article supplement (PMC2206579)

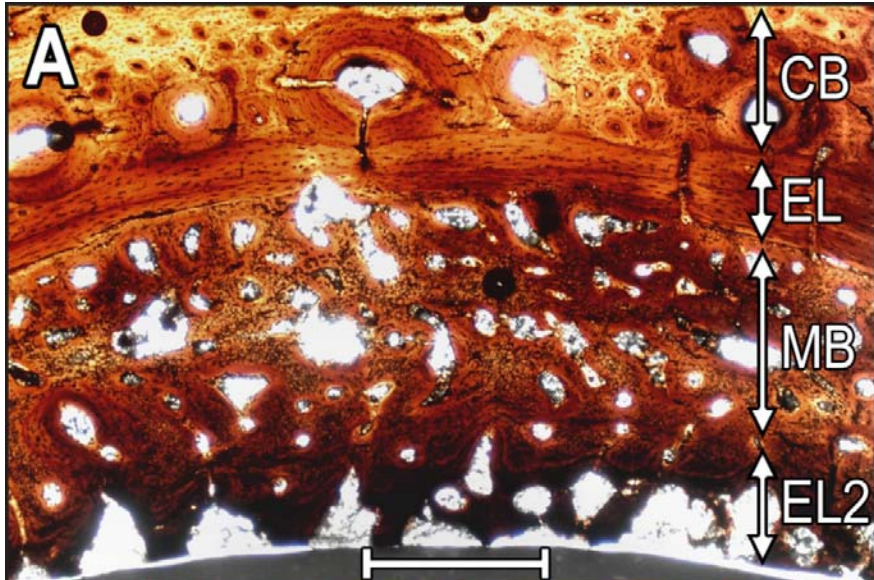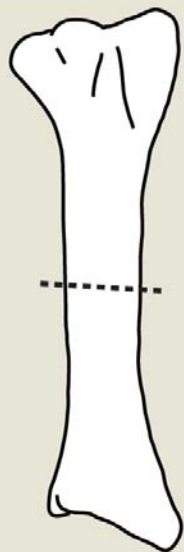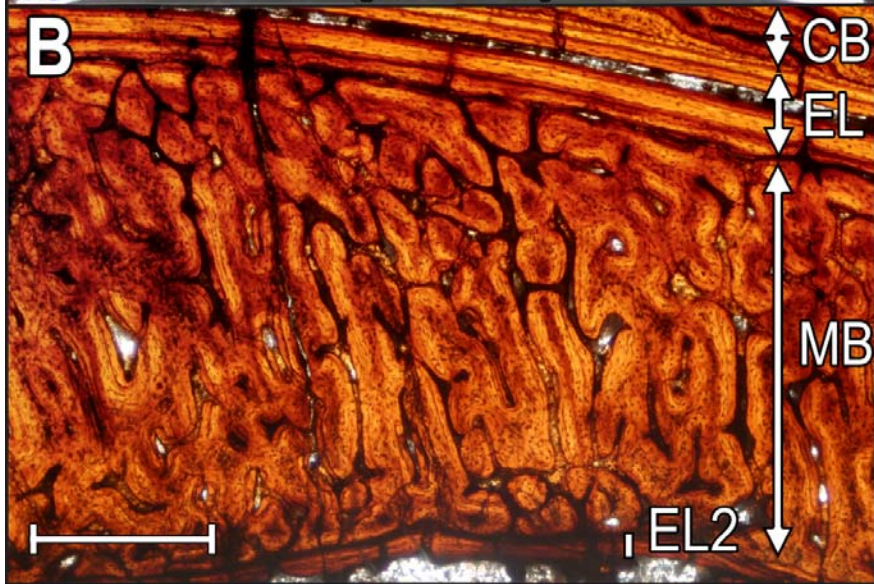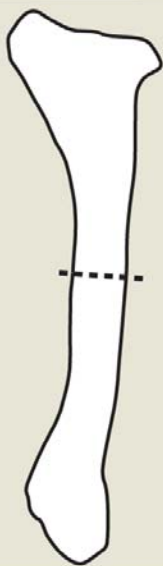

Supplement: pnas_0708903105_1.pdf [file pnas_0708903105_1.pdf]

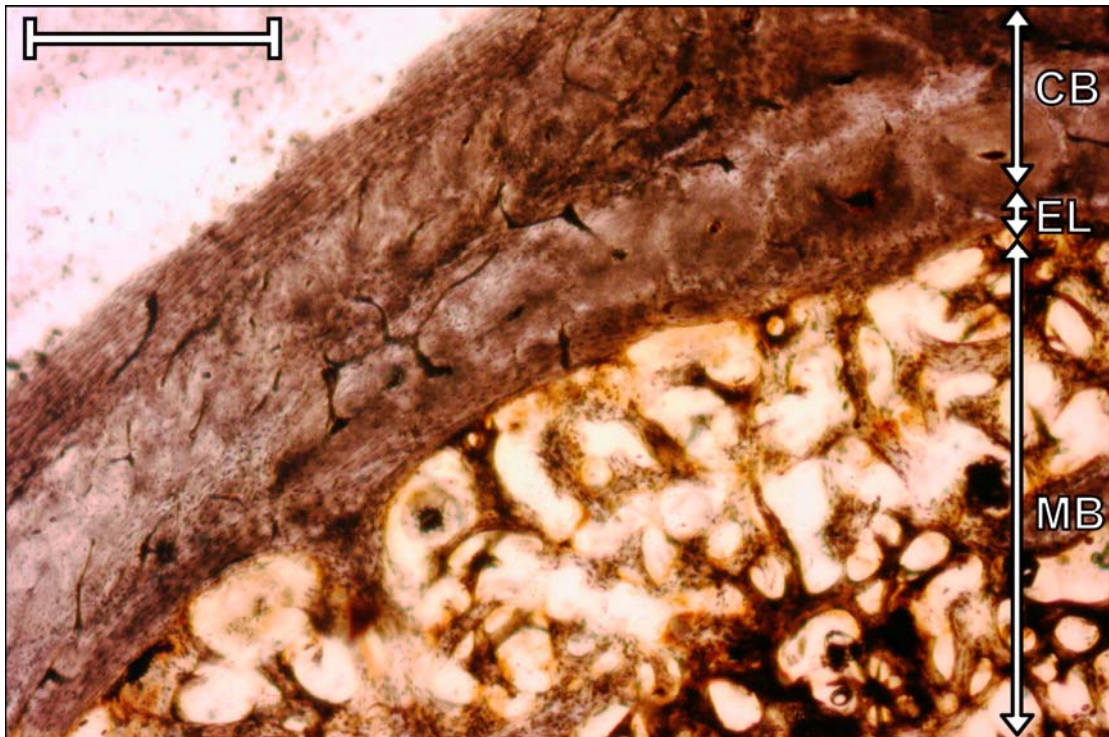

Supplement: pnas_0708903105_2.pdf [file pnas_0708903105_2.pdf]

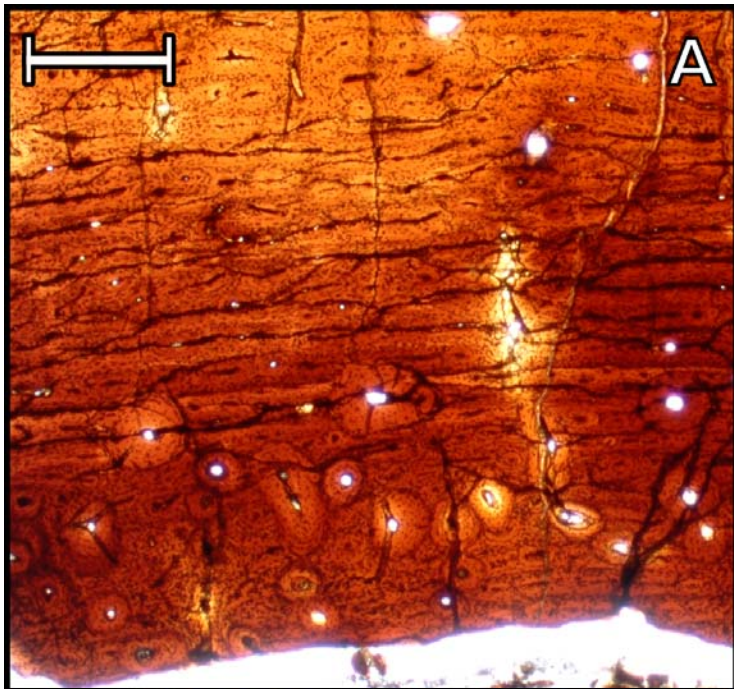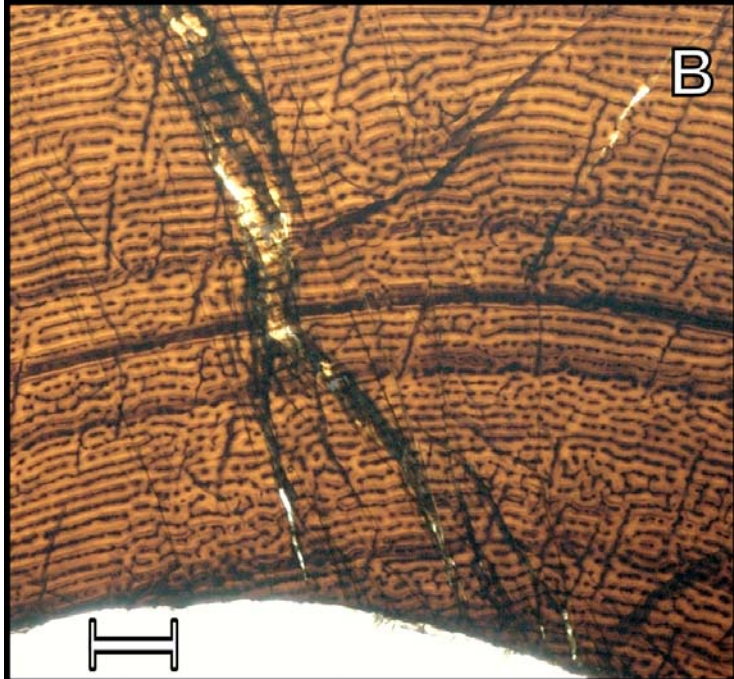

Supplement: pnas_0708903105_3.pdf [file pnas_0708903105_3.pdf]

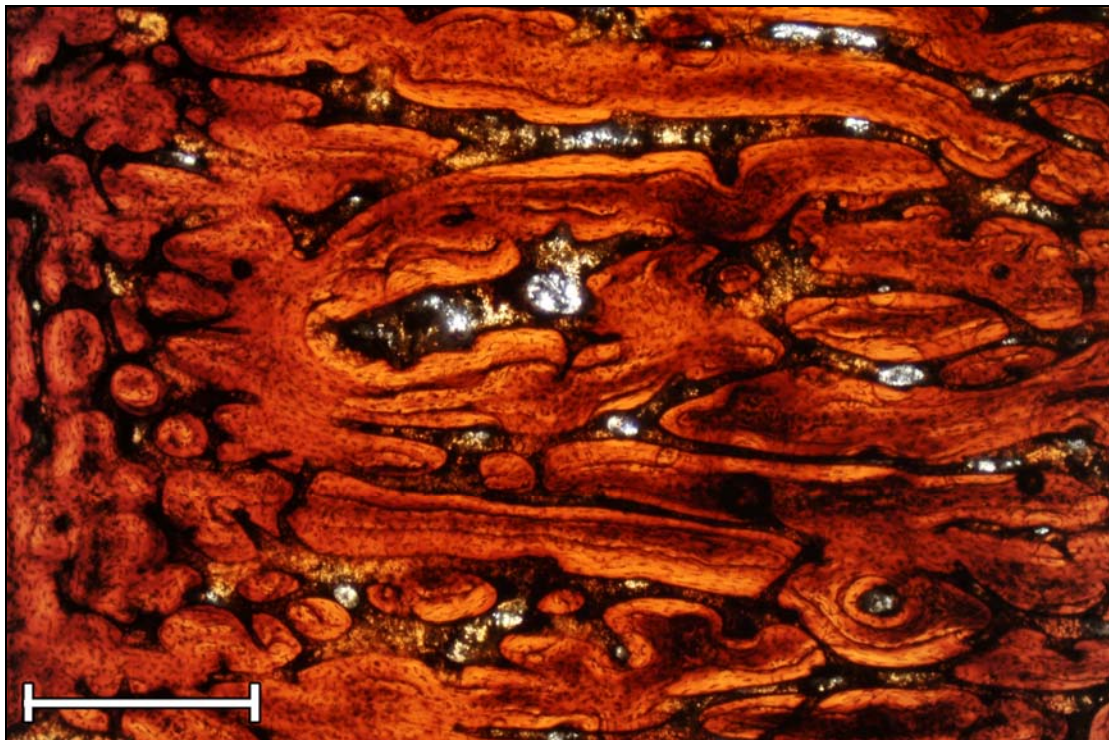

Supplement: pnas_0708903105_4.pdf [file pnas_0708903105_4.pdf]

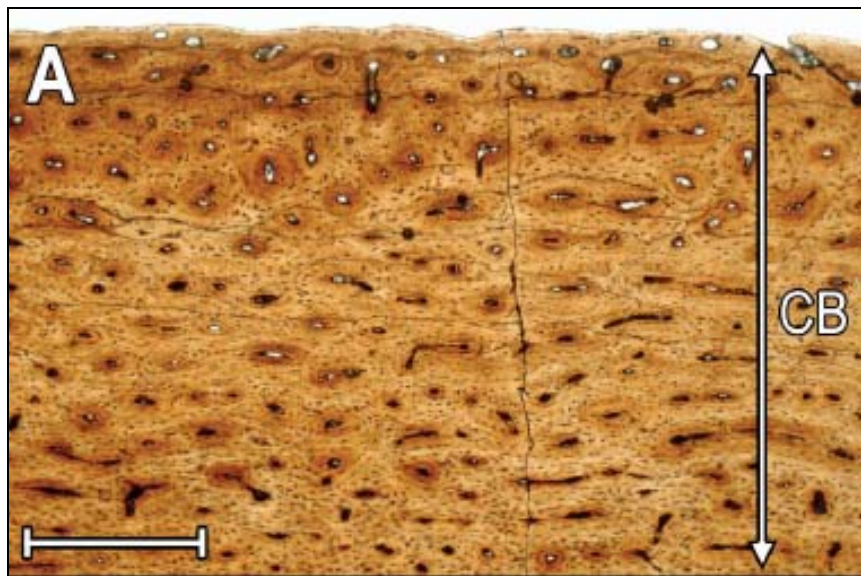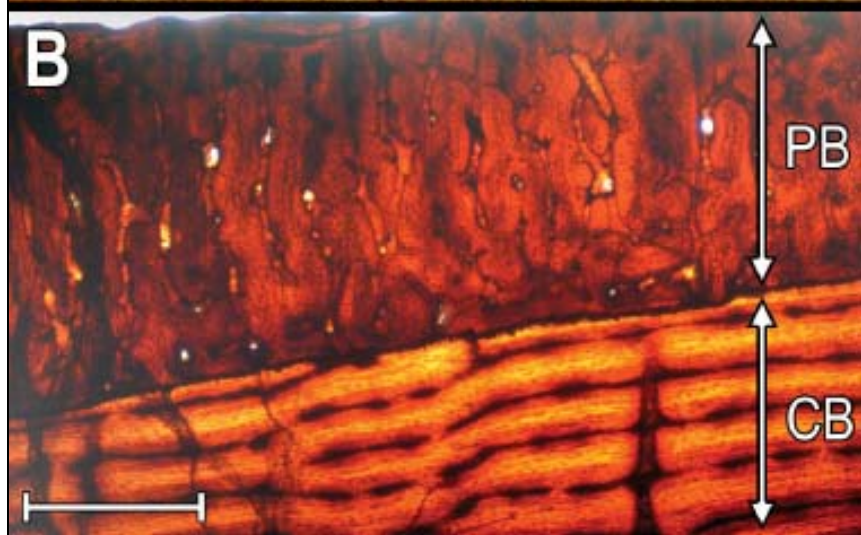

Supplement: pnas_0708903105_5.pdf [file pnas_0708903105_5.pdf]
